# Supplementary material
Source: PubMed Central journal article supplement (PMC6439670)
Supplement: jama-321-1003-s001.pdf [file jama-321-1003-s001.pdf]

1 **SUPPLEMENT 1**

2 This supplement contains the following items:

- 3 1. Original protocol and protocol changes for phase 1, age 0-3
- 4 2. Original statistical analysis plan and changes to the analysis plan for
- 5 a. Phase 1, age 0-3
- 6 b. Phase 2, age 3-6
- 7 3. Original protocol for phase 2, age 3-6.

8

9 **1. Original protocol and protocol changes**

10 **Original Protocol**

11 *The following is an English translation of the original protocol in Danish.*

12 Local Ethics Committee: H-B-2009-014; Approved: 23-02-2009  
13 Danish Health and Medicines Authority: 2612-3959; Approved: 23-02-2009  
14 ClinicalTrials.gov: NCT00856947  
15 EudraCT: 2008-007871-26

16 **Aim**

17 To investigate whether supplementation with high-dose vitamin D during third trimester of pregnancy has a favorable  
18 effect on the development of asthma and related disorders in the offspring.

19 **Hypothesis**

20 High-dose vitamin D<sub>3</sub> supplementation during third trimester of pregnancy will reduce the risk of developing asthma in  
21 the offspring.

22 **Background**

23 Asthma, eczema and allergy are the most common chronic diseases among children and over the past 40 years, the  
24 incidence of these diseases has increased in industrialized countries through yet unknown factors in the environment.

25 Decreased levels of maternal vitamin D in pregnancy and thereby reduced fetal vitamin D levels in utero are among the  
26 early environmental exposures suspected to have an influence on the increased incidence of asthma in children.[1]  
27 Based on epidemiological studies, a high intake of vitamin D during pregnancy has been associated with protective  
28 effects on asthmatic symptoms in young children.[2,3] Preliminary results of a newer study indicates twice the risk of  
29 asthmatic symptoms in preschool children with low vitamin D levels at birth compared to children with a high level of  
30 vitamin D levels at birth.[4]

31 The results are consistent with several other studies, which suggest that the population in westernized countries have a  
32 reduced supply and level of vitamin D leading to an increased risk of various diseases. E.g., vitamin D levels in the  
33 fetus has been associated with the development of schizophrenia, diabetes mellitus and bone development.[5–7]  
34 Furthermore, high levels of vitamin D in adults appears to protect against a number of diseases, including bone diseases  
35 and cancer. [8–10]

36 The reason for these reduced levels of vitamin D may be found in the lifestyle of modern society. The majority of our  
37 vitamin D supply derives from sun exposure, and because of increasing awareness of harmful effects of sun exposure in  
38 relation to skin cancer, our supply of vitamin D has been markedly reduced. This is a recent development, which has led  
39 to the hypothesis that the current levels of vitamin D is too low according to the level for which we are genetically  
40 programmed.

41 Vitamin D level is however associated with and highly influenced by other factors as well. Therefore, it is necessary to  
42 conduct controlled, blinded studies on the effect of vitamin D supplementation to provide sufficient basis for future  
43 recommendations.

44 **Method and trial procedure**

45 The women are recruited from the COPSAC<sub>2010</sub> cohort; Local Ethics Committee (H-B-2008-093), Danish Data  
46 Protection Agency (2008-41-2599).

47 The study is a double-blinded, placebo-controlled, randomized parallel group design. 800 pregnant women will be  
48 randomized in a 1:1 ratio to intake of either high dose vitamin D supplementation or placebo according to one of the  
49 following regimes:

50 1) Placebo (+ guidance in recommended supplement of vitamin D (400units daily)) or

51 2) High dose vitamin D supplement (2400units daily) (+ guidance in recommended supplement of vitamin D  
52 (400units daily))

53 The regimes are administered orally as 2 tablets daily.

54 Blinding and randomization are carried out by the Capital Region Pharmacy and stratified according to treatment group  
55 in the fish oil intervention study (ClinicalTrials.gov: NCT00798226). This allows for equal numbers receiving high  
56 dose vitamin D supplementation in both the fish oil active group and the fish oil placebo group.

57 The intervention is initiated at the beginning of the third trimester (pregnancy week 24) and continued until 1<sup>st</sup> visit to  
58 the COPSAC clinic after birth at week 1-2 postpartum. At the clinical visit in pregnancy week 24, the women will be  
59 provided with the intervention treatment and interviewed about current daily vitamin D intake and history of diseases  
60 likely to influence vitamin D levels. At pregnancy week 36 adherence to the regime will be assessed by interview at the  
61 COPSAC clinic. Furthermore, the women will be instructed to return the remaining tablets at the end of the intervention  
62 for evaluation of their compliance.

63 At pregnancy week 24 and 1<sup>st</sup> visit after birth a blood sample will be drawn from the mother in order to measure 25-  
64 OH-vitamin D, total calcium, parathyroid-hormone (PTH) and alkaline phosphatase.

#### 65 **Inclusion criteria**

66 The study population consists of healthy pregnant women and their children participating in the COPSAC<sub>2010</sub> cohort.  
67 Vitamin D supplements are administered during the third pregnancy trimester. The women will be included in the study  
68 independent of residence, age, race and social status during week 22-26 of pregnancy.

#### 69 **Exclusion criteria**

70 Pregnant women are excluded from the trial, if they carry a disease leading to an increased risk of potential side effects  
71 from high-dose vitamin D supplementation: Endocrinologic disease in the form of calcium metabolic disorders,  
72 parathyroid disease, thyroid disorders or type 1 diabetes; Tuberculosis; Sarcoidosis or illness requiring chronic  
73 treatment with diuretics or heart medications, including calcium channel blockers or if they have a current intake of  
74 vitamin D supplements over the recommended dose.

#### 75 **Risks and disadvantages:**

76 Known potential adverse effects of vitamin D intoxication is hypercalcemia and accompanying symptoms such as loss  
77 of appetite, nausea, vomiting, weight loss, headache, lethargy, fatigue, confusion and renal impairment. These side  
78 effects are not found by the administration of vitamin D in physiological doses. Vitamin D intoxication occurs only by  
79 the intake of very high doses of Vitamin D (4 times higher doses than administered in our study). In order to avoid  
80 administering vitamin D supplements to women with a high initial level, women with an intake above the recommended  
81 dose in the previous 6 months are excluded. Expected disadvantages related to blood sample procedures and are  
82 temporary in nature without the risk of permanent injury.

#### 83 **Ethical aspects**

84 Oral vitamin D supplement has been shown to be safe and non-toxic in many randomized trials, including studies  
85 involving pregnant women. The risk of adverse effects in the pregnant woman or the fetus is suspected to be minimal.  
86 Based on the previous studies, it is expected that a large proportion of the participating women will have a daily low  
87 Vitamin D level, and thereby vitamin D supplementation to these women will be a health benefit. The control group  
88 receive recommended dose of vitamin D, and ethical problems in relation to sufficient treatment of the control group is  
89 thereby not a problem.

90 We believe that the study as outlined above is ethically acceptable and randomized trials of vitamin D supplements are  
91 necessary for future recommendations of vitamin D intake.

#### 92 **Changes to the protocol**

93 Changes to the original protocol are indicated in <https://clinicaltrials.gov/ct2/show/NCT00856947>

94 Briefly, these encompass introduction of novel assessments, including neurological development, growth, systemic  
95 immune status and airway mucosal immune status.

96 **Reference List**

- 97 1 Litonjua AA, Weiss ST. Is vitamin D deficiency to blame for the asthma epidemic? *J Allergy Clin Immunol*  
98 2007;**120**:1031–5. doi:10.1016/j.jaci.2007.08.028
- 99 2 Devereux G, Litonjua AA, Turner SW, *et al.* Maternal vitamin D intake during pregnancy and early childhood  
100 wheezing. *Am J Clin Nutr* 2007;**85**:853–9.
- 101 3 Camargo CA, Rifas-Shiman SL, Litonjua AA, *et al.* Maternal intake of vitamin D during pregnancy and risk of  
102 recurrent wheeze in children at 3 y of age. *Am J Clin Nutr* 2007;**85**:788–95.
- 103 4 Camargo CA, Ingham T, Wickens K, *et al.* Cord-Blood 25-Hydroxyvitamin D Levels and Risk of Respiratory  
104 Infection, Wheezing, and Asthma. *Pediatrics* 2011;**127**:e180–7. doi:10.1542/peds.2010-0442
- 105 5 McGrath J, Selten J-P, Chant D. Long-term trends in sunshine duration and its association with schizophrenia birth  
106 rates and age at first registration — data from Australia and the Netherlands. *Schizophr Res* 2002;**54**:199–212.  
107 doi:10.1016/S0920-9964(01)00259-6
- 108 6 Hyppönen E, Läärä E, Reunanen A, *et al.* Intake of vitamin D and risk of type 1 diabetes: a birth-cohort study. *The*  
109 *Lancet* 2001;**358**:1500–3. doi:10.1016/S0140-6736(01)06580-1
- 110 7 Javaid M, Crozier S, Harvey N, *et al.* Maternal vitamin D status during pregnancy and childhood bone mass at age  
111 9 years: a longitudinal study. *The Lancet* 2006;**367**:36–43. doi:10.1016/S0140-6736(06)67922-1
- 112 8 Bischoff-Ferrari HA, Giovannucci E, Willett WC, *et al.* Estimation of optimal serum concentrations of 25-  
113 hydroxyvitamin D for multiple health outcomes. *Am J Clin Nutr* 2006;**84**:18–28.
- 114 9 Holick MF. Vitamin D deficiency. *N Engl J Med* 2007;**357**:266–81. doi:10.1056/NEJMra070553
- 115 10 Adams JS, Clemens TL, Parrish JA, *et al.* Vitamin-D Synthesis and Metabolism after Ultraviolet Irradiation of  
116 Normal and Vitamin-D-Deficient Subjects. *N Engl J Med* 1982;**306**:722–5. doi:10.1056/NEJM198203253061206

117

118

119 **2. Original statistical analysis plan and changes to the analysis plan**

120 **a) Original statistical analysis plan, phase 1, age 0-3**

121 **Outcome definitions:**

122 Primary outcome

123 Persistent wheeze

124 Description: Age at onset of persistent wheeze in the first 3 years of life diagnosed according to a predefined algorithm  
125 of recurrent troublesome lung symptoms, response to treatment and relapse after withdrawal of treatment

126 Secondary outcomes

127 Asthma exacerbations

128 Description: Age at onset of severe asthma exacerbations diagnosed by predefined criteria of acute severe asthma  
129 requiring oral/high dose inhaled steroids or acute hospital contact

130 Eczema

131 Description: Age at onset of eczema diagnosed prospectively by research doctors according to predefined algorithm  
132 based upon Hanifin and Rajka criteria

133 Allergic sensitization

134 Description: Allergic sensitization at 6 and/or 18 months of age assessed by skin prick test and specific IgE in blood

135 Infections

136 Description:

137 Main analysis: Number of lower respiratory tract infections registered in daily diaries

138 Secondary analyses: Acute otitis media, number of upper respiratory tract infections, number of other infections, total  
139 number of infections

140 **Statistical analyses:**

141 The effect of high-dose Vitamin D<sub>3</sub> supplementation on age at onset of persistent wheeze, lower respiratory infections,  
142 and eczema is analyzed by Cox proportional hazards regression, where p-values correspond to Wald tests. The children  
143 are retained in the model from birth until age of diagnosis, drop out, or age at their last clinic visit before the RCT was  
144 unblinded.

145 The effect of Vitamin D<sub>3</sub> supplementation on the cross-sectional end-points asthma and allergic sensitization is  
146 analyzed by logistic regression, whereas the effect on number of wheezy episodes and upper respiratory infections is  
147 analyzed by a generalized estimating equation (GEE) Poisson regression model.

148 The effect on airway immunology is analyzed by calculating geometric mean ratios of each mediator in the high-dose  
149 Vitamin D<sub>3</sub> vs. control group and by a principal component analysis (PCA) capturing the overall immunological trends  
150 in the data and their relation to the intervention analyzed by Wilcoxon rank sum test. Initially, the mediator levels were  
151 log-transformed. Prior to the PCA the variables were scaled to unit variance.

152 The primary analysis of persistent wheeze is presented crude and adjusted for sex, birth season, maternal Vitamin D  
153 level at randomization, and the n-3 LCPUFA RCT.

154 A significance level of 0.05 is used in all types of analyses.

155 **Changes to the statistical analysis plan**

156 Power calculation

157 A power calculation was performed based upon the available number of 587 children participating in the Vitamin D  
158 trial. The Vitamin D<sub>3</sub> RCT had a 65% power to detect a difference between the treatment groups (alpha=0.05, two-  
159 tailed) based on the 587 included children, an effect of 0.5 in the Vitamin D<sub>3</sub> supplementation group, and a 12%  
160 expected frequency of persistent wheeze in the control group.

161 Additional secondary endpoints:

162 The novel assessments introduced in the cohort resulted in additional secondary end-points:

163 Airway mucosal immune status

164 Description: Immune status measured in airway mucosal lining fluid at 4 weeks and 2 years of age (combined  
165 assessments by principal component analyses for each age point)

166 Systemic immune status

167 Description:

168 Main analysis: Immune status at 18 months measured in stimulated whole blood as cytokine release (combined  
169 assessments by principal component analyses)

170 Secondary analysis: Composition of immune cell subsets in whole blood at birth and at 18 months of age

171 Neurological development 0-3 years

172 Description:

173 Main analysis: Cognitive development assessed at 2½ years using the cognitive part of Bayley Scales of Infant and  
174 Toddler Development, third edition

175 Secondary analyses: 1) Milestone development monitored prospectively by the parents using a registration form based  
176 on The Denver Development Index and WHO milestones registration (combined assessment by principal component  
177 analysis); 2) Language development assessed at 1 and 2 years of age with the Danish version of The MacArthur Bates  
178 Communicative Developmental Inventory (CDI); 3) The child's general development (language, fine and gross motor,  
179 social and problem solving) at 3 years of age assessed with Ages and stages Questioner, third edition (ASQ-3)

180 Growth

181 Description:

182 Main analysis: Body composition (fat mass and bone mineral density) assessed by DEXA scan at 3 years of age

183 Secondary analysis: Development of BMI from birth to 3 years assessed longitudinally in the research clinic.

184

185 **b) Statistical analysis plan, phase 2, age 3-6**

186 **Outcome definitions:**

187 Primary outcome

188 Asthma

189 Description: Asthma is diagnosed according to the same predefined algorithm of recurrent troublesome lung symptoms,  
190 response to treatment and relapse after withdrawal of treatment, which was used for persistent wheeze at age 0-3.

191 Primary outcome in phase 2 is current asthma at age 6, which is diagnosed in children fulfilling the persistent wheeze  
192 algorithm at any point during the first 6 years of life and still needing inhaled corticosteroids at age 6 to remain well  
193 controlled.

194 Secondary outcomes

195 Lung function

196 Description: Age 6 measurements of FEV1, MMEF, FEV1/FVC ratio from spirometry and sRaw from plethysmography.

197

198 Bronchial reactivity

199 Description: Provocative dose of methacholine leading to a 20% drop in FEV1 from baseline (PD20) at age 6.

200

201 Airway inflammation

202 Description: Fractional of exhaled nitric oxide (FeNO) at age 6.

203

204 Allergic sensitization

205 Description: Allergic sensitization at age 6 assessed by skin prick test and specific IgE in blood.

206 Allergic rhinitis

207 Description: Allergic sensitization combined with troublesome congestion or sneezing or runny nose upon relevant  
208 exposure to allergens at age 6.  
209

210 **Statistical analyses:**

211 Primary outcome: The effect of high-dose Vitamin D<sub>3</sub> supplementation on the primary outcome asthma at age 6 is  
212 analyzed with logistic regression presented crude and adjusted for sex, birth season, maternal Vitamin D level at  
213 randomization, and the n-3 LCPUFA RCT.

214 Secondary outcome analyses: The effect of Vitamin D<sub>3</sub> supplementation on the cross-sectional end-points allergic  
215 sensitization and rhinitis is analyzed by logistic regression, whereas the effect of continuous outcomes (FEV1, MMEF,  
216 FEV1/FVC ratio, sRaw, FeNO and PD20) is analyzed with linear regression models. FeNO is log-transformed prior to  
217 analysis. PD20 is calculated by fitting a logistic regression function to the dose-response curves; the PD20 values are  
218 log-transformed prior to analysis.

219 A significance level of 0.05 is used in all types of analyses.  
220

221

222 **3. Original protocol for phase 2, age 3-6.**

223 The National Committee on Health Research Ethics,  
224 The Capital Region of Denmark  
225 Regionsgården  
226 Kongens Vænge 2  
227 3400 Hillerød  
228  
229

Gentofte 9/9/2013

230 Notification to The National Committee on Health Research Ethics – Additional Protocol Phase 2, 3-6y follow-up  
231 All the information stated in this document are available for publication.  
232

233 **Committee**

234 Primary Committee: The National Committee on Health Research Ethics  
235 Project ID: H-B-2008-093  
236 Notification nr.: 39915  
237 Additional Protocol nr.: 15

238 **A. Responsible investigator**

239 1. Title: Professor, dr. med  
240 2. Name: Hans Bisgaard  
241 3. Hospital/Institution: Gentofte Hospital  
242 4. Department: Copenhagen Prospective Studies on Asthma in Childhood  
243 5. Address: Ledreborg Alle 34  
244 6. Postal code/7. City: 2820 Gentofte  
245 8. Phone: 3977 7360  
246 9. E-mail: bisgaard@copsac.com

247 **B. Other contact persons**

248 1. Title: MD, PhD  
249 2. Name: Jakob Stokholm  
250 3. Hospital/Institution: Gentofte Hospital  
251 4. Department: Copenhagen Prospective Studies on Asthma in Childhood  
252 5. Address: Ledreborg Alle 34  
253 6. Postal code/7. City: 2820 Gentofte  
254 8. Phone: 3977 7360  
255 9. E-mail: jakob.stokholm@dbac.dk

256 **C. Project information**

257 1. Project title: Asthma Begins in Childhood – ABC-cohort; in publications named the  
258 COPSAC2010.  
259  
260 2. Changes: We want to continue the ABC-cohort study trial with embedded DB-RCT  
261 of high-dose vitamin D and n-3 LCPUFA during pregnancy with 3  
262 scheduled clinic visits at age 4, 5 and 6 years to follow-up on the primary  
263 outcome of the DB-RCT. The main objectives of the trial are unchanged  
264 and we still focus on asthma development as well as new methods to  
265 predict the risk of asthma, allergy, hay fever and eczema. Additionally, we  
266 focus on other relevant factors influencing the child's general health and  
267 growth and use the same tests as in earlier clinical visits. New  
268 measurements are added when the child can cooperate at the age 6 years:  
269 spirometry, bronchial reactivity to metacholine, fractional exhaled nitric  
270 oxide (FeNO) measurements and scrape samples from the nasal mucous  
271 membrane for mRNA analysis.  
272



273 3. Reason for changes: As the children have been followed during 11 scheduled clinic visits from  
274 pregnancy till 3 years of age, we have already collected a large amount of  
275 data regarding influencing factors that could affect the child in the first  
276 years of life. Evidence suggests that causes for development of asthma,  
277 allergy and eczema is to be found in early life and already in pregnancy  
278 due to a possible complex interaction between genetics and environment.  
279 A follow-up on the children is very important as not many diseases are  
280 present before 3 years of age and asthma symptoms have a great variation  
281 over time. The additional lung function measurements (bronchial reactivity  
282 and FeNO) have been used for many years in the diagnosis and follow-up  
283 of asthma in both children and adults. The nasal scrape is used in the  
284 analysis of nasal membrane mRNA, this a helpful tool to understand which  
285 genes are active in disease and can be linked to the gene analyses in the  
286 blood samples.  
287  
288 4. Ethical considerations: None of the above tests are associated with any kinds of health risks. The  
289 nasal scrape can be considered slightly uncomfortable and in some cases  
290 cause nosebleed. Spirometry, plethysmography, metacholine test, FeNO  
291 measurement and nasal scrape are considered harmless and closely  
292 monitored by the doctors. Therefore, we consider the implementation of  
293 the new tests safe and without any ethical issues.  
294  
295 5. Is new participant information required due to the changes? Yes  
296  
297  
298 Signature of responsible investigator:  
299



Underskrift  
Professor, dr. med Hans Bisgaard  
Gentofte Hospital  
Dansk børneAstma Center  
Ledreborg Alle 34  
2820 Gentofte

300

301

302 Overview of clinical tests; phase 2:

| <b>Children</b>                      | <b>4 years</b> | <b>5 years</b> | <b>6 years</b> | <b>Investigations of biologic material</b>        |
|--------------------------------------|----------------|----------------|----------------|---------------------------------------------------|
| Airway and eczema diary              | x              | x              | x              |                                                   |
| Doctor examination                   |                |                | x              |                                                   |
| Tympanometry                         |                |                | x              |                                                   |
| Blood pressure                       |                |                | x              |                                                   |
| Growth details                       | x              | x              | x              |                                                   |
| Urine sample                         |                |                | x              | Interleukins, leukotrienes and metabolic products |
| Blood sample                         |                |                | x              | sIgE, immune system, epigenetics and metabolomics |
| Skin prick test                      |                |                | x              | Allergy                                           |
| Hair sample                          |                |                | x              | Cotinine (nicotine product)                       |
| Faeces sample                        | x              | x              | x              | Microbiological colonization                      |
| Skin swab                            |                |                | x              | Microbiological colonization                      |
| Throat swab                          |                |                | x              | Microbiological colonization                      |
| Nasal scrape                         |                |                | x              | mRNA - gene expression                            |
| Activity measure                     |                |                | x              |                                                   |
| DXA scan                             |                |                | x              | Bone density                                      |
| Spirometry                           |                |                | x              |                                                   |
| Bodybox                              | x              |                | x              |                                                   |
| Metacholine provocation              |                |                | x              |                                                   |
| FeNO measure                         |                |                | x              |                                                   |
| Child Behavior Checklist             |                |                | x              | Mentality and behavior                            |
| <b>Parents</b>                       |                |                |                |                                                   |
| Interview - child environment        | x              | x              | x              |                                                   |
| Interview - child asthma and allergy | x              | x              | x              |                                                   |

303

304

305
