# Supplementary material
Source: PubMed Central journal article supplement (PMC6439670)
Supplement: jama-321-1003-s002.pdf [file jama-321-1003-s002.pdf]

Brustad N, Eliassen AU, Stockholm J, Bønnelykke K, Bisgaard H, Chawes BL. High-dose vitamin D supplementation during pregnancy and asthma in offspring at age 6 years. *JAMA*. doi:10.1001/jama.2019.0052

## **Data Sharing Statement**

### **Data**

**Data available:** Yes

**Data types:** Deidentified participant data

**How to access data:** Data will be available in anonymous form upon request to the corresponding author Hans Bisgaard at bisgaard@copsac.com

**When available:** With publication

## **Supporting Documents**

**Document types:** None

## **Additional Information**

**Who can access the data:** Researchers whose proposed use of the data has been approved.

**Types of analyses:** For any approved purpose.

**Mechanisms of data availability:** With investigator support after approval of a proposal and after a signed data access agreement.

**Any additional restrictions:** None.
